# Supplementary material
Source: publisher figshare collection journal article supplement (https://acs.figshare.com/ndownloader/files/21950619)
Supplement: Supplementary file 1 [file 21950619]

# Supporting Information

## Bimetallic Sulfide $\text{Sb}_2\text{S}_3@\text{FeS}_2$ Hollow Nanorods as High-Performance Anode Materials for Sodium-Ion Batteries

*Liang Cao,<sup>‡</sup> Xuanwen Gao,<sup>§</sup> Bao Zhang,<sup>‡</sup> Xing Ou<sup>\*,‡</sup> Jiafeng Zhang,<sup>‡</sup> Wen-Bin Luo<sup>\*,§</sup>*

*<sup>‡</sup> School of Metallurgy and Environment, Central South University, No.932 South Lushan Road, Changsha, Hunan 410083, P. R. China*

*<sup>§</sup> Institute for Energy Electrochemistry and Urban Mines Metallurgy, School of Metallurgy, Northeastern University, No. 11 Lane 3, Wenhua Road, Shenyang, Liaoning, 110819, P. R. China*

Corresponding Authors

E-mail: ouxing@csu.edu.cn (X. Ou);

luowenbin@smm.neu.edu.cn (W.-B. Luo)

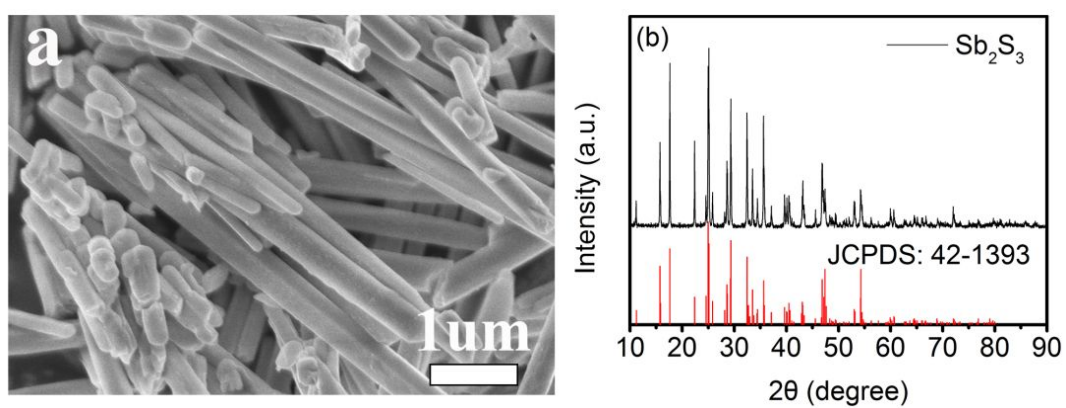

**Figure S1.** SEM image (a) and XRD pattern (b) of  $\text{Sb}_2\text{S}_3$  nanorod precursor.

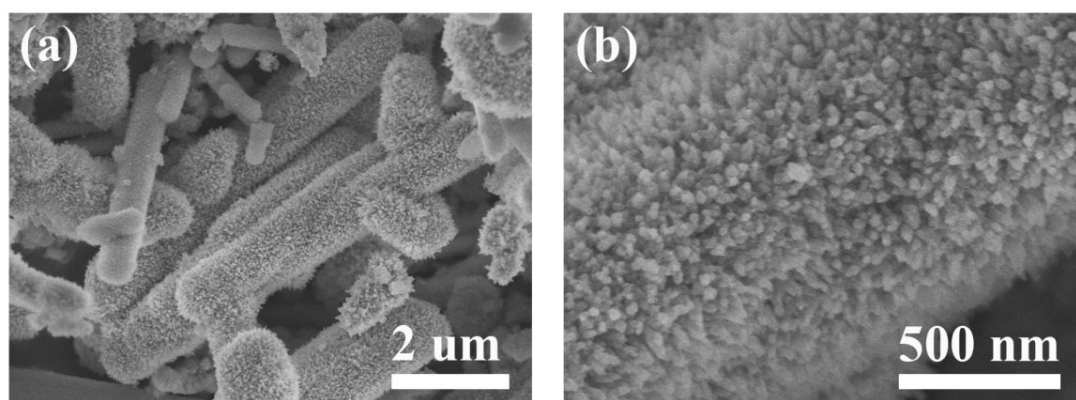

**Figure S2.** Pristine (a) and magnified (b) SEM images of  $\text{Sb}_2\text{S}_3@Fe_2O_3$  precursor.

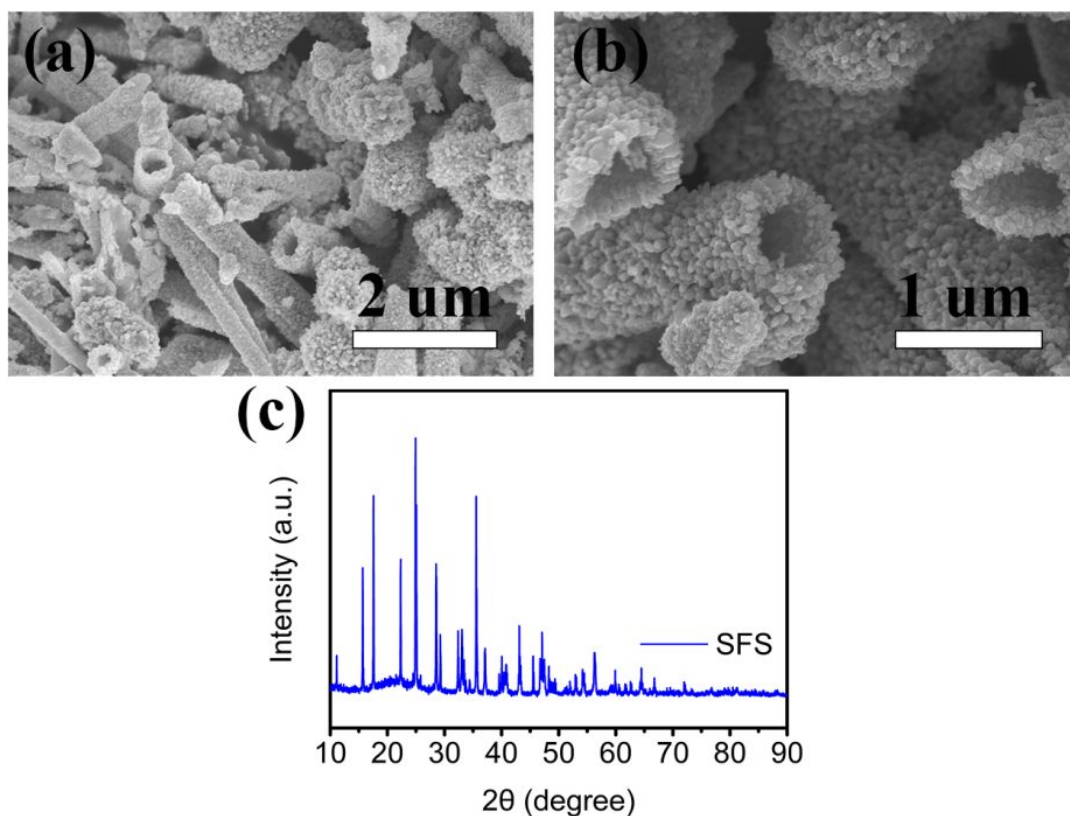

**Figure S3.** Pristine (a) and magnified (b) SEM images of SFS composite. XRD pattern of SFS composite (c).

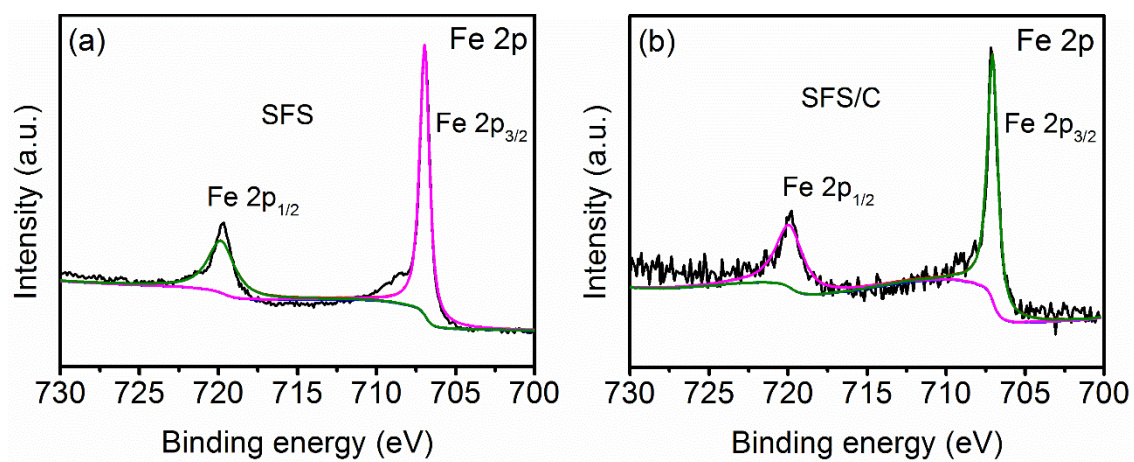

**Figure S4.** High-resolution Fe 2p XPS spectra for SFS (a) and SFS/C (b) composites.

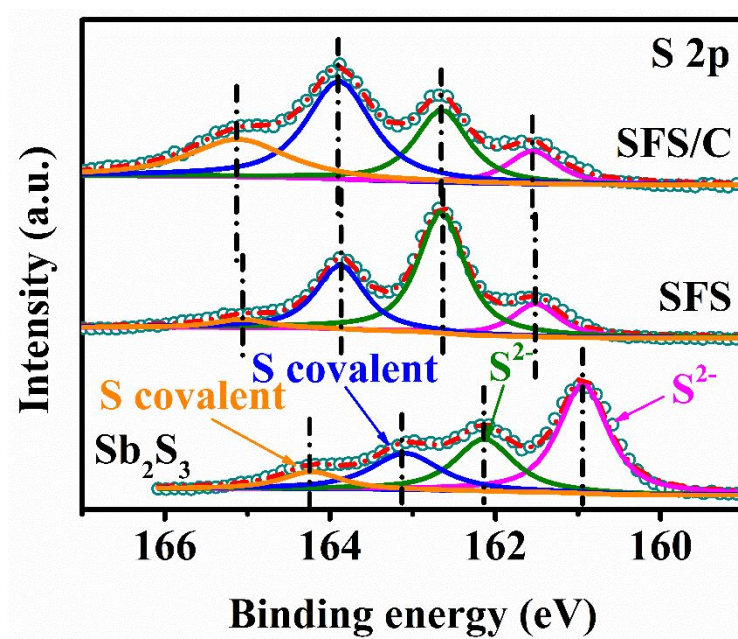

**Figure S5.** High-resolution S 2p XPS spectra for Sb<sub>2</sub>S<sub>3</sub>, SFS and SFS/C electrodes.

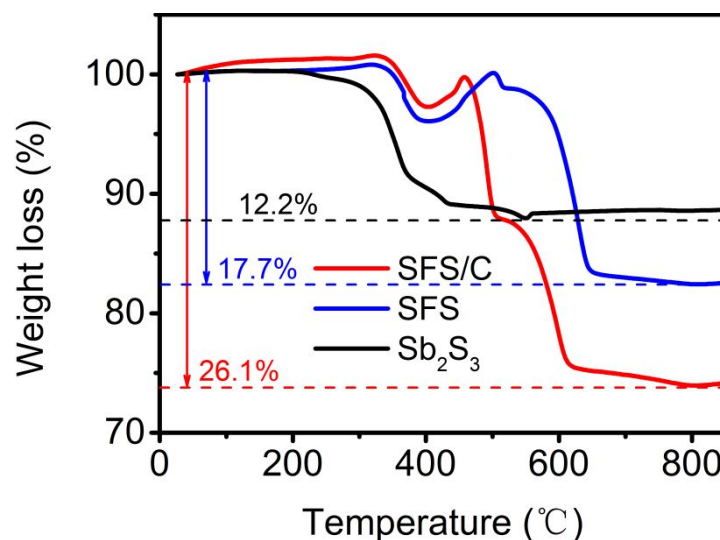

**Figure S6.** The TGA analysis of SFS/C, SFS and Sb<sub>2</sub>S<sub>3</sub> composites.

For the SFS/C electrode, the initial weight loss between 300 and 400°C is attributed to the combustion of Sb<sub>2</sub>S<sub>3</sub> with the formation of Sb<sub>2</sub>O<sub>4</sub>.<sup>S1</sup> The following two stages of weight loss in the range of 400-600 °C can be assigned to the combustion of carbon in air and the oxidation of FeS<sub>2</sub> to Fe<sub>2</sub>O<sub>3</sub>, respectively.<sup>S2</sup> It is worth noting that the weight increase at around 400°C may be indexed into the formation of FeSO<sub>4</sub>.<sup>S3</sup> The content of the graphene is calculated to be  $\approx 10.2\%$ .

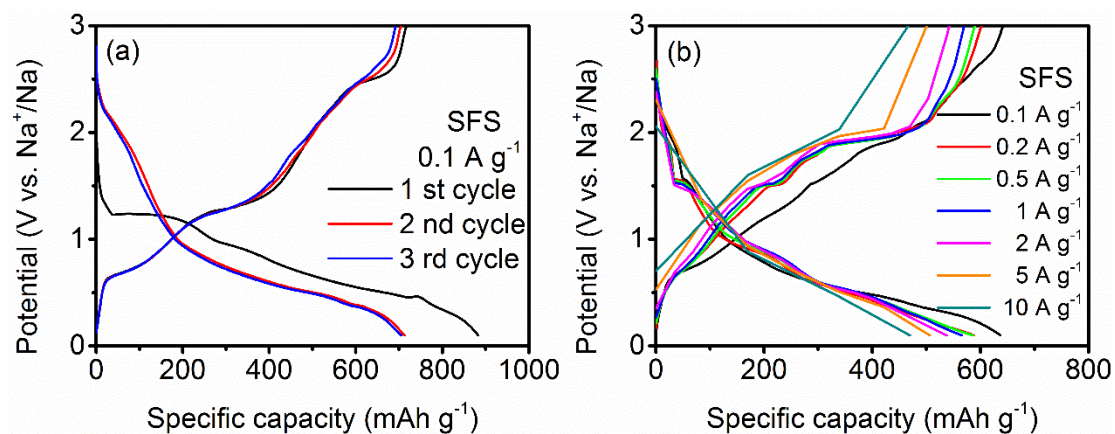

**Figure S7.** The charge/discharge curves during the initial three cycles at 0.1 A g<sup>-1</sup> (a), and at different current densities from 0.1 to 10 A g<sup>-1</sup> (b) for SFS electrode.

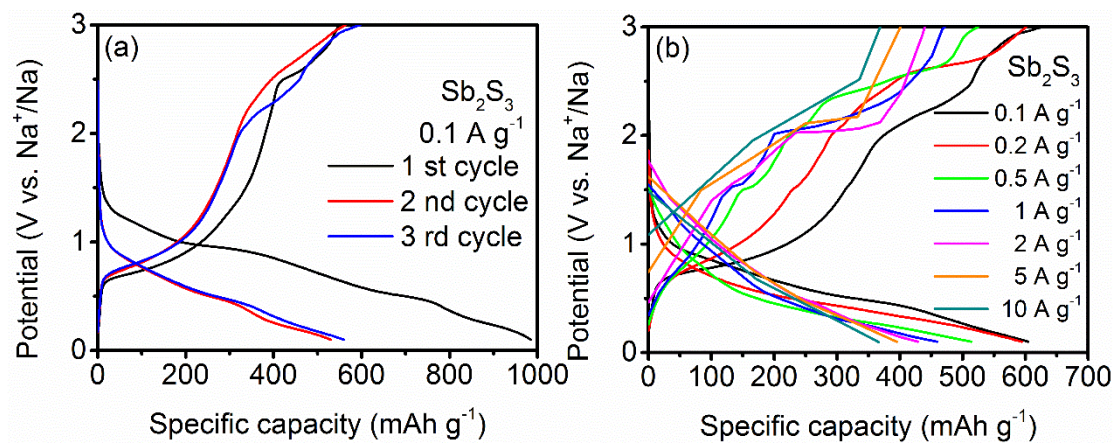

**Figure S8.** The charge/discharge curves during the initial three cycles at 0.1 A g<sup>-1</sup> (a), and at different current densities from 0.1 to 10 A g<sup>-1</sup> (b) for Sb<sub>2</sub>S<sub>3</sub> electrode.

**Table S1.** Comparison of the cycling stability of SFS/C with other reported Sb<sub>2</sub>S<sub>3</sub>-based anodes for SIBs.

| Sample                                                | Current<br>density (mA<br>g <sup>-1</sup> ) | Cycle<br>number | Reversible<br>capacity (mAh<br>g <sup>-1</sup> ) | References       |
|-------------------------------------------------------|---------------------------------------------|-----------------|--------------------------------------------------|------------------|
| MWNTs@Sb <sub>2</sub> S <sub>3</sub> @PPy             | 100                                         | 100             | 596                                              | S1               |
| IL-Sb <sub>2</sub> S <sub>3</sub> /rGO                | 500                                         | 100             | 495.1                                            | S2               |
| ZnS-Sb <sub>2</sub> S <sub>3</sub> @C                 | 100                                         | 120             | 630                                              | S4               |
| SnS <sub>2</sub> /Sb <sub>2</sub> S <sub>3</sub> @rGO | 1000                                        | 400             | 513                                              | S5               |
| Sb <sub>2</sub> S <sub>3</sub> /PPy                   | 500                                         | 50              | 236                                              | S6               |
| Sb <sub>2</sub> S <sub>3</sub> /MoS <sub>2</sub>      | 100                                         | 100             | 610                                              | S7               |
| Sb <sub>2</sub> S <sub>3</sub> @MWCNTs                | 50                                          | 50              | 412.3                                            | S8               |
| Sb <sub>2</sub> S <sub>3</sub> @C                     | 100                                         | 100             | 699.1                                            | S9               |
| Sb <sub>2</sub> S <sub>3</sub> @P/C                   | 50                                          | 100             | 611                                              | S10              |
| SSNR/C                                                | 100                                         | 100             | 570                                              | S11              |
| rGO/ Sb <sub>2</sub> S <sub>3</sub>                   | 50                                          | 50              | 670                                              | S12              |
| a- Sb <sub>2</sub> S <sub>3</sub>                     | 50                                          | 100             | 586                                              | S13              |
| <b>SFS/C</b>                                          | <b>5000</b>                                 | <b>1000</b>     | <b>534.8</b>                                     | <b>This work</b> |
| <b>SFS</b>                                            | <b>5000</b>                                 | <b>600</b>      | <b>518.9</b>                                     | <b>This work</b> |



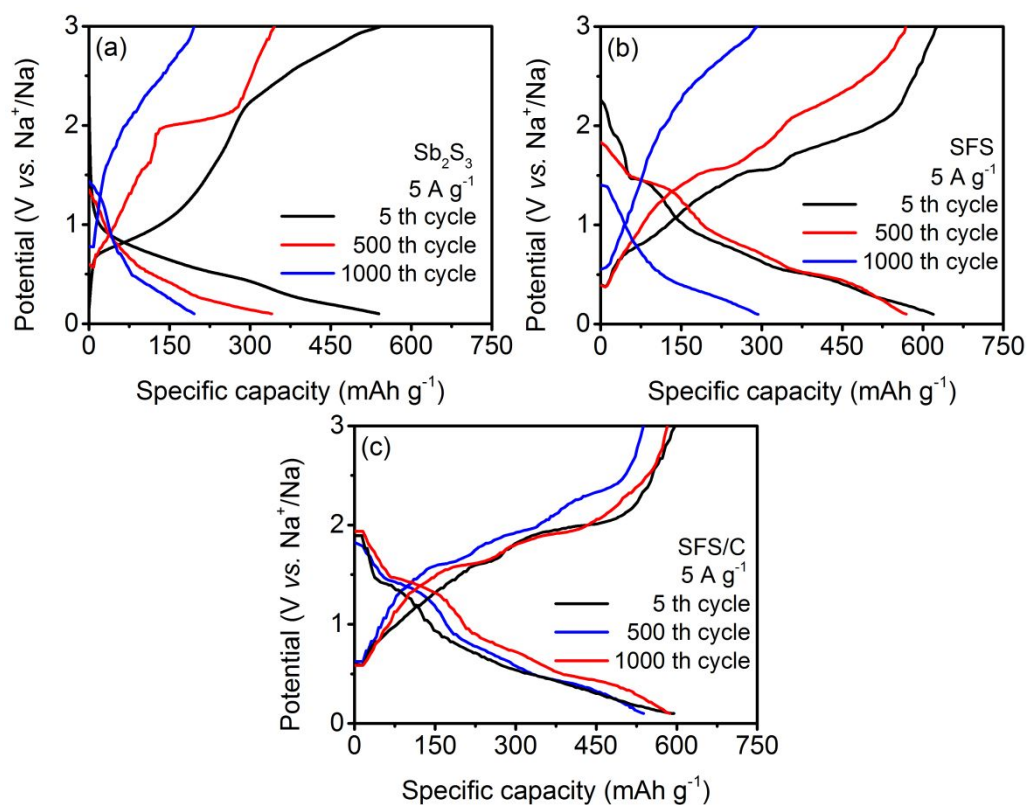

**Figure S9.** The charge/discharge curves at ultrahigh rate of 5 A g<sup>-1</sup> at different cycles for Sb<sub>2</sub>S<sub>3</sub> (a), SFS (b), and SFS/C (c) composites.



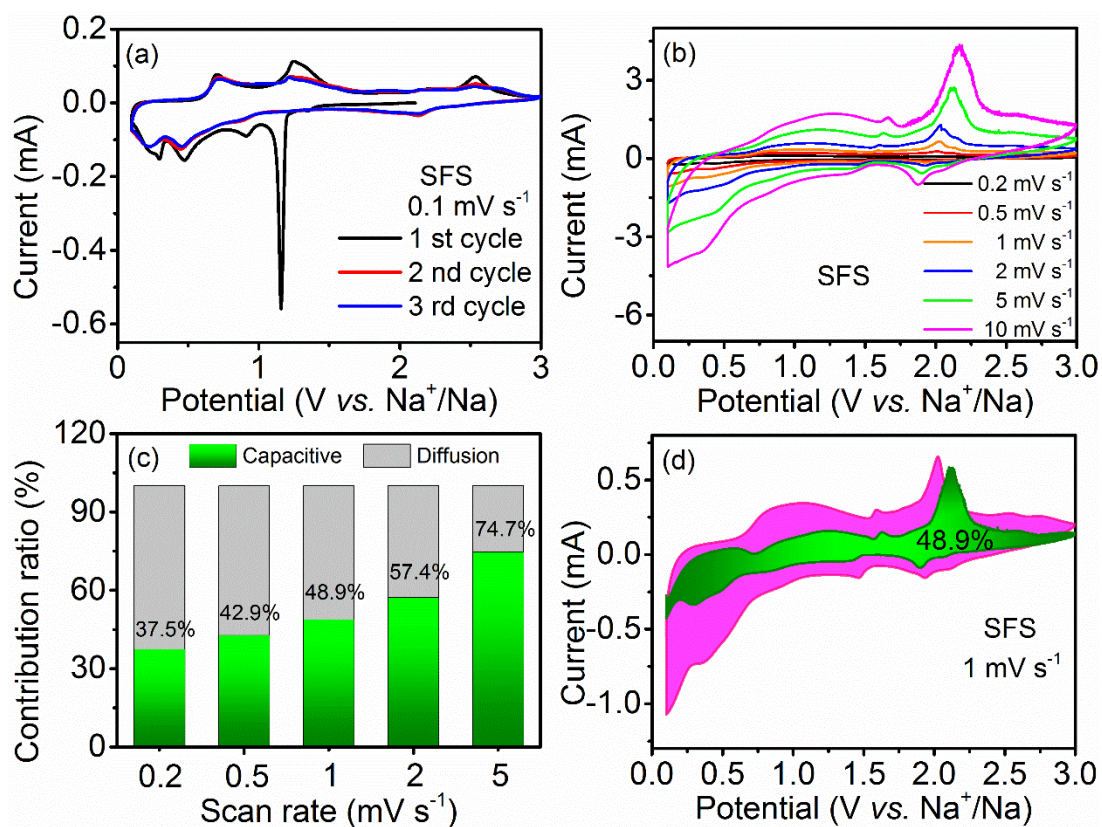

**Figure S10.** The CV curves at a scan rate of  $0.1 \text{ mV s}^{-1}$  during the initial three cycles (a), and at different scan rates (b) for SFS composite. The proportion of capacity contribution at different scan rates (c) and the CV curves with the pseudocapacitive contribution at  $1.0 \text{ mV s}^{-1}$  (d) for SFS composite.

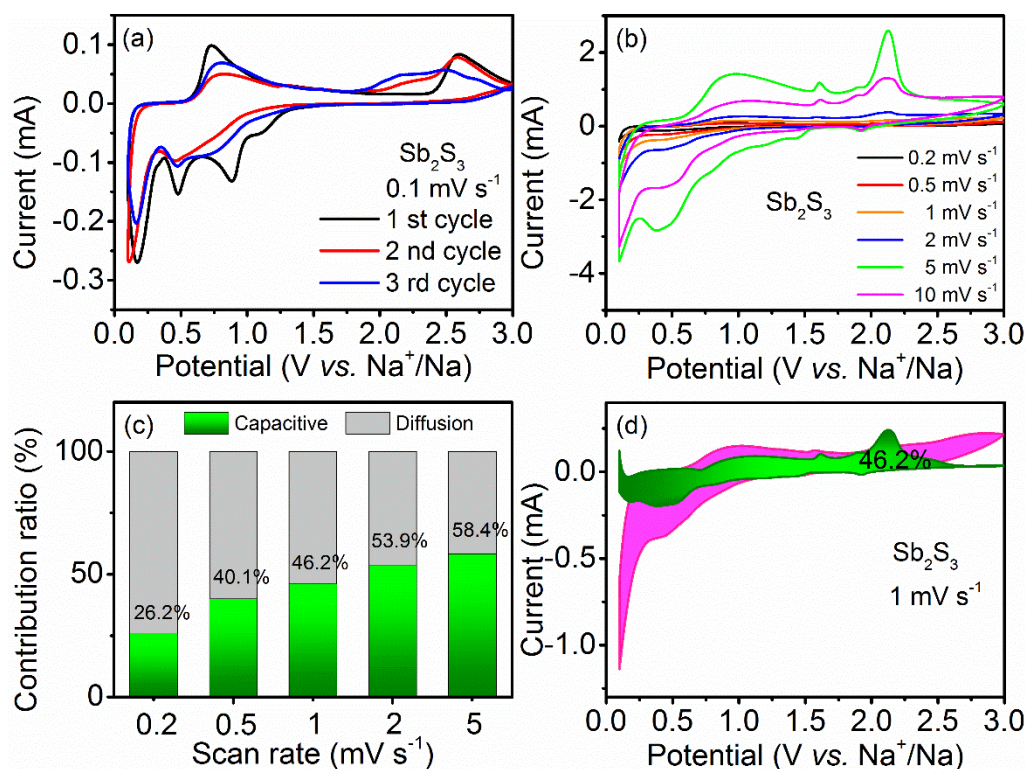

**Figure S11.** The CV curves at a scan rate of  $0.1 \text{ mV s}^{-1}$  during the initial three cycles (a), and at different scan rates (b) for  $\text{Sb}_2\text{S}_3$  composite. The proportion of capacity contribution at different scan rates (c) and the CV curves with the pseudocapacitive contribution at  $1.0 \text{ mV s}^{-1}$  (d) for  $\text{Sb}_2\text{S}_3$  electrode.

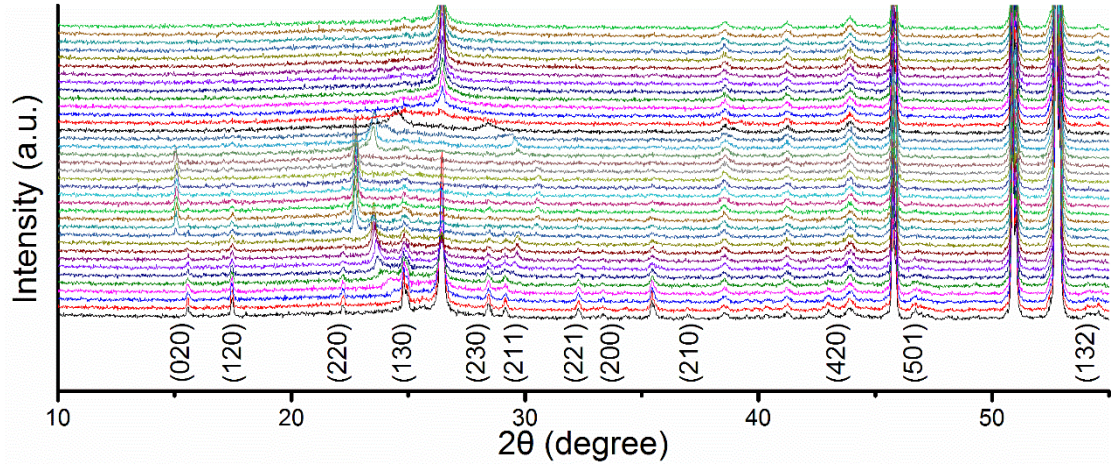

**Figure S12.** Stacked *in-situ* XRD patterns during the first cycle for SFS/C composite.

**Table S2.** Fitting results of EIS in Figure 5 with the proposed equivalent circuit.

| Samples                 | $R_s(\Omega)$ | $R_{ct}(\Omega)$ | $\sigma(\Omega\text{cm}^2\text{s}^{-1/2})$ | $D_{Na^+}(\text{cm}^2\text{s}^{-1})$ |
|-------------------------|---------------|------------------|--------------------------------------------|--------------------------------------|
| $\text{Sb}_2\text{S}_3$ | 9.869         | 15.99            | 118.21                                     | $3.34 \times 10^{-15}$               |
| SFS                     | 9.185         | 11.88            | 95.72                                      | $5.09 \times 10^{-15}$               |
| SFS/C                   | 8.598         | 5.98             | 54.63                                      | $1.63 \times 10^{-14}$               |

$R_s$  represents the series resistance,  $R_{ct}$  indicates the charge-transfer resistance and CPE expresses the constant phase element.

**Equations S1, S2.**

$$D_{Na^+} = \frac{R^2 T^2}{2n^4 F^4 A^2 C^2 \sigma^2} \quad (\text{S1})$$

$$Z' = R_s + R_{ct} + \sigma \omega^{-1/2} \quad (\text{S2})$$

Where  $R$ ,  $T$ ,  $A$ ,  $F$ ,  $n$ ,  $C$  and  $\sigma_w$  represent the gas constant, absolute temperature, electrode surface area, Faraday's constant, number of electron transform per molecule, the insertion/extraction  $\text{Na}^+$  concentration and Warburg factor, respectively.

**Table S3.** Energetic results of Na<sub>2</sub>S adsorption for Sb<sub>2</sub>S<sub>3</sub>@FeS<sub>2</sub> and pure Sb<sub>2</sub>S<sub>3</sub>. (Na atom: large yellow sphere, Sb atom: shallow orange sphere, S atom: dark orchid sphere, Fe atom: cyan sphere).

|           | Sb <sub>2</sub> S <sub>3</sub> @FeS <sub>2</sub>                                    | Sb <sub>2</sub> S <sub>3</sub>                                                       |
|-----------|-------------------------------------------------------------------------------------|--------------------------------------------------------------------------------------|
| $E_{ads}$ | -1.34 eV                                                                            | -0.50 eV                                                                             |
| Side view | 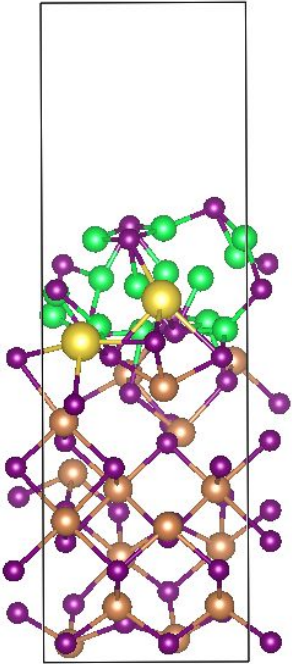  |   |
| Top view  |  |  |



**Table S4.** Difference charge density analysis of  $\text{Sb}_2\text{S}_3@\text{FeS}_2$ .

| $\text{Sb}_2\text{S}_3@\text{FeS}_2$                                               |                                                                                    |
|------------------------------------------------------------------------------------|------------------------------------------------------------------------------------|
| Side view                                                                          | Top view                                                                           |
| 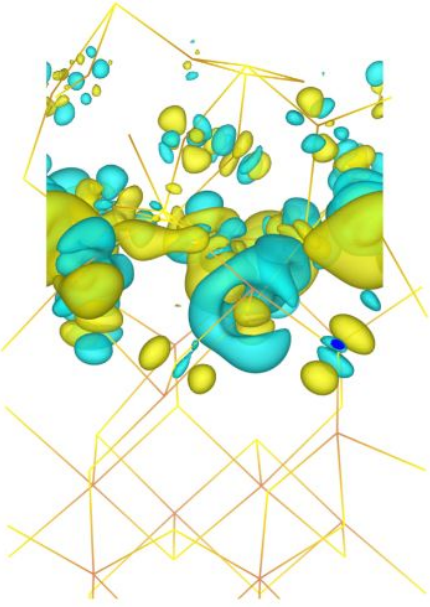 |  |

The total charge density of both  $\text{Sb}_2\text{S}_3$  and  $\text{Sb}_2\text{S}_3@\text{FeS}_2$  shows similar charge density distribution on the Sb-S plane. While the difference charge density of  $\text{Sb}_2\text{S}_3@\text{FeS}_2$  exhibits the obvious change in electron density, suggesting the strong interaction between  $\text{Sb}_2\text{S}_3$  and  $\text{FeS}_2$ .

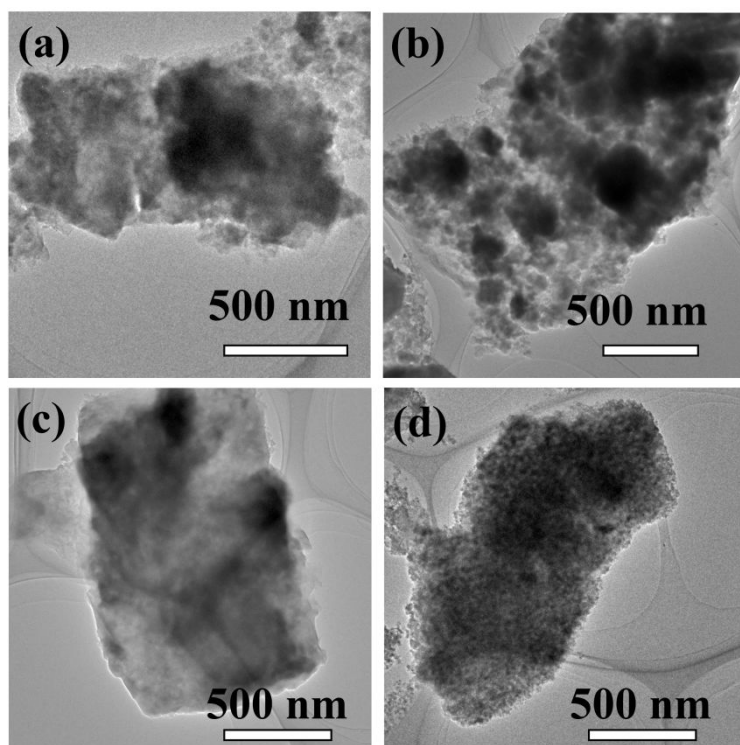

**Figure S13.** The TEM images of SFS/C electrode at different potential states during the initial (de)sodiation process: discharged to 0.8 V (a) and 0.1 V (b), charged to 1.4 V (c) and 3.0 V (d).

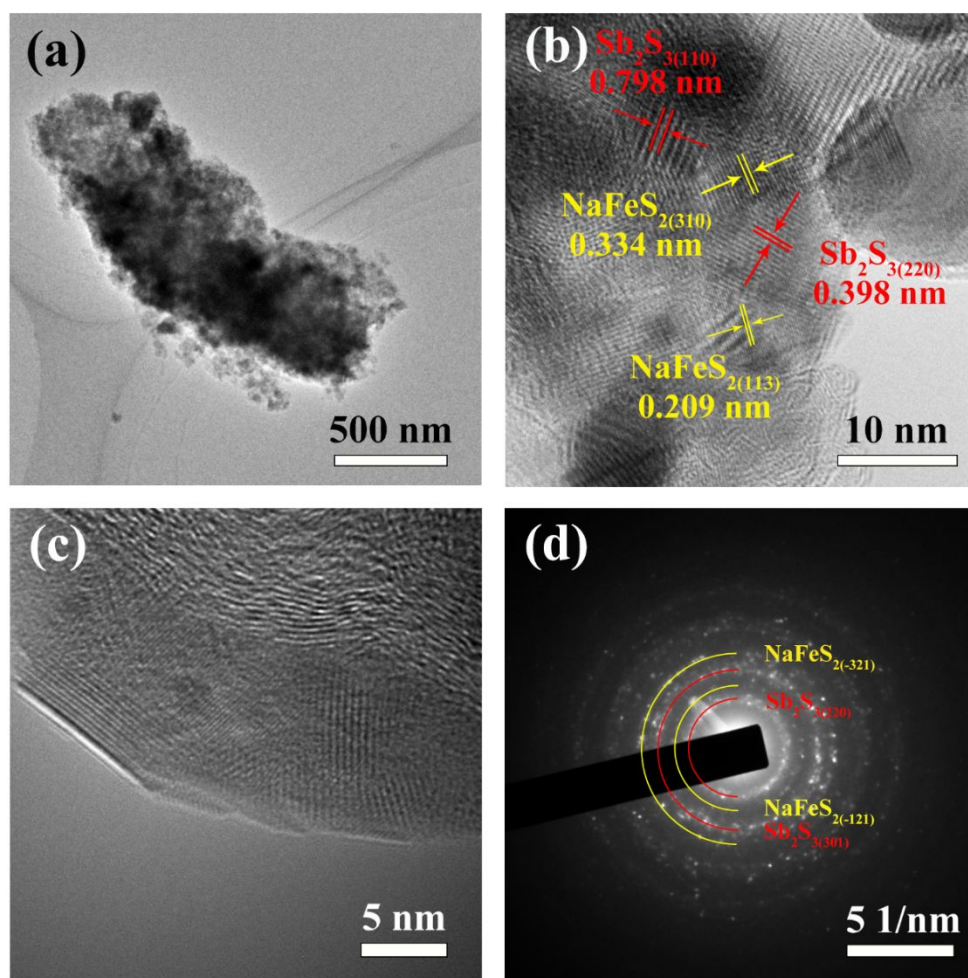

**Figure S14.** The TEM (a), magnified TEM (b), HRTEM (c) and SAED (d) images of the SFS/C electrodes after 100 cycles at a current density of 0.5 A g<sup>-1</sup>.



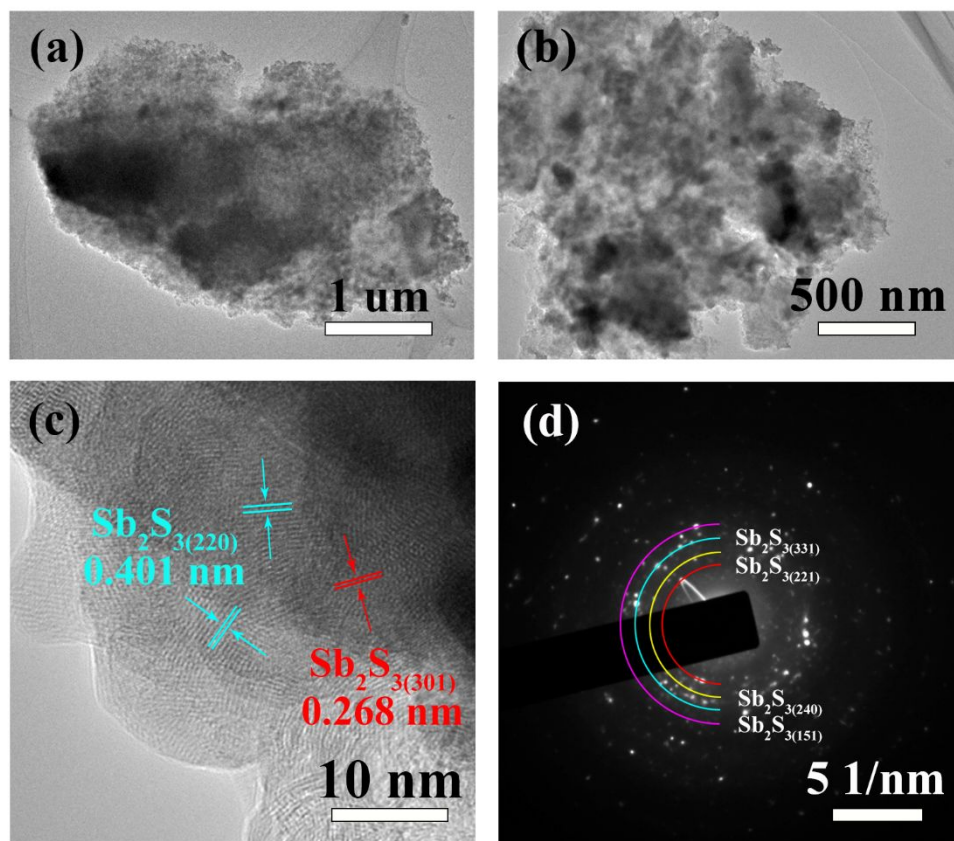

**Figure S15.** The TEM (a), magnified TEM (b), HRTEM (c) and SAED (d) images of the  $\text{Sb}_2\text{S}_3$  electrode after 100 cycles at a current density of  $0.5 \text{ A g}^{-1}$ .

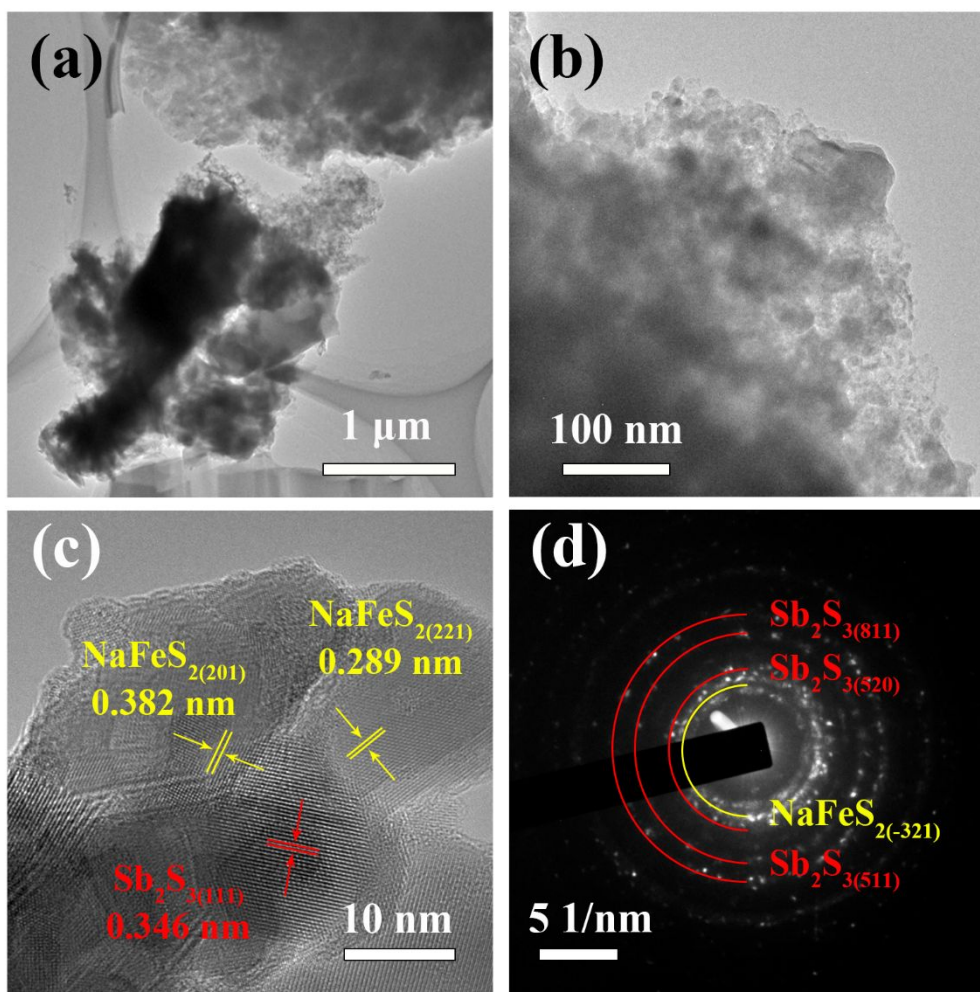

**Figure S16.** The TEM (a), magnified TEM (b), HRTEM (c) and SAED (d) images of the SFS electrode after 100 cycles at a current density of 0.5 A g<sup>-1</sup>.

## REFERENCES

- S1. Wang, S.; Yuan, S.; Yin, Y.-B.; Zhu, Y.-H.; Zhang, X.-B.; Yan, J.-M. Green and Facile Fabrication of MWNTs@Sb<sub>2</sub>S<sub>3</sub>@PPy Coaxial Nanocables for High-Performance Na-Ion Batteries. *Part. Part. Syst. Char.* **2016**, *33*, 493-499.
- S2. Pan, Z.-Z.; Yan, Y.; Cui, N.; Xie, J.-C.; Zhang, Y.-B.; Mu, W.-S.; Hao, C. Ionic Liquid-Assisted Preparation of Sb<sub>2</sub>S<sub>3</sub>/Reduced Graphene Oxide Nanocomposite for Sodium-Ion Batteries. *Adv. Mater. Interfaces* **2018**, *5*, 1701481.
- S3. Cho, J. S.; Park, J. S.; Kang, Y. C. Porous FeS Nanofibers with Numerous Nanovoids Obtained by Kirkendall Diffusion Effect for Use as Anode Materials for Sodium-Ion Batteries. *Nano Res.* **2017**, *10*, 897-907.
- S4. Dong, S.; Li, C.; Ge, X.; Li, Z.; Miao, X.; Yin, L. ZnS-Sb<sub>2</sub>S<sub>3</sub>@C Core-Double Shell Polyhedron Structure Derived from Metal-Organic Framework as Anodes for High Performance Sodium Ion Batteries. *ACS Nano* **2017**, *11*, 6474-6482.
- S5. Wang, S.; Liu, S.; Li, X.; Li, C.; Zang, R.; Man, Z.; Wang, G. SnS<sub>2</sub>/Sb<sub>2</sub>S<sub>3</sub> Heterostructures Anchored on Reduced Graphene Oxide Nanosheets with Superior Rate Capability for Sodium-Ion Batteries. *Chem. - Eur. J.* **2018**, *24*, 3873-3881.
- S6. Zheng, T.; Li, G.; Zhao, L.; Shen, Y. Flowerlike Sb<sub>2</sub>S<sub>3</sub>/PPy Microspheres Used as Anode Material for High-Performance Sodium-Ion Batteries. *Eur. J. Inorg. Chem.* **2018**, *10*, 1224-1228.
- S7. Zhang, Z.; Zhao, J.; Xu, M.; Wang, H.; Gong, Y.; Xu, J. Facile Synthesis of Sb<sub>2</sub>S<sub>3</sub>/MoS<sub>2</sub> Heterostructure as Anode Material for Sodium-Ion Batteries. *Nanotechnology* **2018**, *29*, 335401.

- S8. Li, J.; Yan, D.; Zhang, X.; Hou, S.; Li, D.; Lu, T.; Yao, Y.; Pan, L. *In Situ* Growth of Sb<sub>2</sub>S<sub>3</sub> on Multiwalled Carbon Nanotubes as High-Performance Anode Materials for Sodium-Ion Batteries. *Electrochim. Acta* **2017**, *228*, 436-446.
- S9. Hou, H.; Jing, M.; Huang, Z.; Yang, Y.; Zhang, Y.; Chen, J.; Wu, Z.; Ji, X. One-Dimensional Rod-Like Sb<sub>2</sub>S<sub>3</sub>-Based Anode for High-Performance Sodium-Ion Batteries. *ACS Appl. Mater. Interfaces* **2015**, *7*, 19362-19369.
- S10. Choi, J.-H.; Ha, C.-W.; Choi, H.-Y.; Shin, H.-C.; Park, C.-M.; Jo, Y.-N.; Lee, S.-M. Sb<sub>2</sub>S<sub>3</sub> Embedded in Amorphous P/C Composite Matrix as High-Performance Anode Material for Sodium Ion Batteries. *Electrochim. Acta* **2016**, *210*, 588-595.
- S11. Yao, S.; Cui, J.; Lu, Z.; Xu, Z.-L.; Qin, L.; Huang, J.; Sadighi, Z.; Ciucci, F.; Kim, J.-K. Unveiling the Unique Phase Transformation Behavior and Sodiation Kinetics of 1D van der Waals Sb<sub>2</sub>S<sub>3</sub> Anodes for Sodium Ion Batteries. *Adv. Energy Mater.* **2017**, *7*, 1602149.
- S12. Yu, D. Y. W.; Prihodchenko, P. V.; Mason, C. W.; Batabyal, S. K.; Gun, J.; Sladkevich, S.; Medvedev, A. G.; Lev, O. High-Capacity Antimony Sulphide Nanoparticle-Decorated Graphene Composite as Anode for Sodium-Ion Batteries. *Nat. Commun.* **2013**, *4*, 2922.
- S13. Hwang, S. M.; Kim, J.; Kim, Y.; Kim, Y. Na-Ion Storage Performance of Amorphous Sb<sub>2</sub>S<sub>3</sub> Nanoparticles: Anode for Na-Ion Batteries and Seawater Flow Batteries. *J. Mater. Chem. A* **2016**, *4*, 17946-17951.
